# Supplementary material
Source: MDPI journal article supplement (https://www.mdpi.com/1660-4601/11/9/9680)
Supplement: s2 [file s2]

Supplementary Information

Initial Steps for Quality Improvement of Obesity Care Across Divisions at a Tertiary Care Pediatric Hospital

**Characterizing Practice Systems**

**Structured Interviews with Key Informants of Respective Clinics [1–3]**

Introductory Script

“Thank you for your participation. The following questions aim to understand the processes of care that subspecialists use to identify overweight/obesity and elevated blood pressure across their practices.”

**PRACTICE__________________________________________________________________**

**Resources**

1. Do clinics in your division provide educational materials (ie handouts/brochures) about obesity management to families of obese patients?

Yes, across the division

Yes, certain clinics:_____________________________________________

Widely Available Materials (*i.e.* CDC, *etc.*)

Division-Specific Materials (*i.e.* Epic patient education materials)

Other_______________________________________________

No

Don’t know

1. Are there available resources within clinics in your division to help you identify and manage obese patients?

Yes, across the division

Yes, certain clinics:_____________________________________________

EPIC Smart Texts

Referral to special clinics for obese patients (ie fatty liver clinic)

Other_______________________________________________

No

Don’t know

1. Does your division have an assigned dietitian who sees pediatric patients in the outpatient setting?

Yes

If yes, how many ½ days per week __________

No

Don’t know

1. Is there a dietitian available in clinics within your division for counseling of obese patients identified in your practice?

Yes, specify clinics:____________________________________________

No

Don’t know

**Measurements**

1. At which types of visits are patients’ height or length routinely measured at clinics within your division?

Initial Consultation  Follow-up Consultation

Initial Well-Child  Follow-up Well-Child

Specifics:____________________________________________________________

5b. Who takes these measurements?

Doctor Nurse Nursing assistant/auxiliary  Other

5c. Who interprets these measurements?

(Clarification: Interpret refers to reading from record and assessing percentile)

Doctor Nurse Nursing assistant/auxiliary  Other

1. At which types of visits are patients’ weight routinely measured at clinics within your division?

Initial Consultation  Follow-up Consultation

Initial Well-Child  Follow-up Well-Child

Specifics:____________________________________________________________

6b. What are patients usually wearing when they are weighed?

Hospital Gown

Regular Clothes

Other, specify ______________________________________________________

6c. Who takes these measurements?

Doctor Nurse Nursing assistant/auxiliary  Other

6d. Who interprets these measurements?

(Clarification: Interpret refers to reading from record and assessing percentile)

Doctor Nurse Nursing assistant/auxiliary  Other

1. At which types of visits are patients’ blood pressure routinely measured at clinics within your division?

Initial Consultation  Follow-up Consultation

Initial Well-Child  Follow-up Well-Child

Specifics:___________________________________________________________

7b. Who takes these measurements?

Doctor Nurse Nursing assistant/auxiliary  Other

7c. Who interprets these measurements?

(Clarification: Interpret refers to reading from record and assessing percentile)

Doctor Nurse Nursing assistant/auxiliary  Other

**Methods**

1. Is there anything special about how clinics in your division obtain height or length measurements?

Yes, describe:__________________________________________________

Written protocol

If written protocol, please provide copy of the protocol.

No

Don’t know

1. Is there anything special about how clinics in your division obtain weight measurements?

Yes, describe:__________________________________________________

Written protocol

If written protocol, please provide copy of the protocol.

No

Don’t know

1. Is there anything special about how clinics in your division obtain blood pressure measurements?

Yes, describe:__________________________________________________

Written protocol

If written protocol, please provide copy of the protocol.

No

Don’t know

**Data Entry**

1. Who is responsible for routinely entering height/weight measurements into Epic?

Clinician

Nurse

Nursing assistant/auxiliary

Other (please specify):_______________________________________

Don’t know

1. Who is responsible for routinely entering blood pressure measurements into Epic?

Clinician

Nurse

Nursing assistant/auxiliary

Other (please specify):_______________________________________

Don’t know

**PROTOCOLS_____________________________________________________________**

1. Are there any strategies/protocols in place within clinics in your division **to identify** overweight/obese patients?

Written Protocol

Describe:____________________________________________

Informal Policies

Describe:____________________________________________

No

1. Are there any strategies/protocols in place within clinics in your division **to manage** overweight/obese patients?

Written Protocol

Describe:____________________________________________

Informal Policies

Describe:____________________________________________

No

1. Are there any strategies/protocols in place within clinics in your division **to identify** patients with elevated blood pressure?

Written Protocol

Describe:____________________________________________

Informal Policies

Describe:____________________________________________

No

1. Are there any strategies/protocols in place within clinics in your division **to manage** patients with elevated blood pressure?

Written Protocol

Describe:____________________________________________

Informal Policies

Describe:____________________________________________

No

1. Do clinics in your division screen for obesity related comorbidities?

Yes

If yes, what is routinely screened for and within which clinics? ____________

No

Don’t Know

If yes, answer Questions 18 and 19.

1. Please describe what is usually done by providers in clinics within your division when a patient is identified with an obesity related comorbidity. (open ended)

Follow-up Management:

Return to PCP

Referral Out, specify:____

Other:

1. Are there protocols in place for the management of obesity related comorbidities?

Yes

Written Protocol

Described:____________________________________________

Provided

Informal Policies

Other: ___________________

No

Don’t know

**PHILOSOPHY________________________________________________________________**

**Roles**

1. What do you think is the role of clinics within your division in **identifying** overweight or obese patients?

Open ended, to be categorized

_________

_____

No role

1. What do you think is the role of clinics within your division in **managing** overweight or obese patients?

Open ended, to be categorized

________

________

No role

1. What do you think is the role of clinics within your division in **identifying** patients with obesity-related comorbidities?

Open ended, to be categorized

_________

_____

No role

1. What do you think is the role of clinics within your division in **managing** patients with obesity-related comorbidities?

Open ended, to be categorized

_________

_____

No role

1. What do you think is the role of clinics within your division in **identifying** patients with elevated blood pressure?

Open ended, to be categorized

________

________

No role

1. What do you think is the role of clinics within your division in **managing** patients with elevated blood pressure?

Open ended, to be categorized

________

________

No role

**Barriers**

1. What barriers do you perceive to identifying obese/overweight patients within clinics in your division? (Open ended, to be categorized)

________

________

No barriers

26b. Do you have any ideas on how to address these barriers?

1. What barriers do you perceive to providing care to obese/overweight patients within clinics in your division? (Open ended, to be categorized)

________

________

No barriers

27b. Do you have any ideas on how to address these barriers?

1. What barriers do you perceive to identifying patients with elevated blood pressure within clinics in your division? (Open ended, to be categorized)?

________

________

No barriers

28b. Do you have any ideas on how to address these barriers?

1. What barriers do you perceive to providing care for patients with elevated blood pressure within clinics in your division? (Open ended, to be categorized)

________

________

No barriers

29b. Do you have any ideas on how to address these barriers?

**INTERESTS**

1. What resources or strategies do you think would help clinics in your division identify and address patients who are overweight or obese? (asked as an open ended question)

**Y N**

Handouts/Brochures

Changes in EPIC Medical Record Forms

Meetings/Educational Courses

Specific Protocols/Guidelines for Identification and Treatment

Specific Protocols/Guidelines for Referral

Expanded Referral Options for Obesity Care within Lurie Children’s

Other, please specify:__________________________________________

1. What resources or strategies do you think would help clinics in your division identify and address patients with elevated blood pressure? (asked as an open ended question)

**Y N**

Handouts/Brochures

Changes in EPIC Medical Record Forms

Meetings/Educational Courses

Specific Protocols/Guidelines for Identification and Treatment

Specific Protocols/Guidelines for Referral

Expanded Referral Options for Blood Pressure Management within Lurie

Children’s

Other, please specify:__________________________________________

**Survey Adapted From:**

1. Ariza, A.J.; Laslo, K.M.; Thomson, J.S.; Seshadri, R.; Binns, H.J.; Group, P.P.R. Promoting Growth Interpretation and Lifestyle Counseling in Primary Care. *J. Pediatr.* 2008;10.
2. Barlow, S.E.; Dietz, W.H.; Klish, W.J.; Trowbridge, F.L. Medical Evaluation of Overweight Children and Adolescents: Reports From Pediatricians, Pediatric Nurse Practitioners, and Registered Dietitians. *Pediatrics* **2002**, *110*, 222–228.
3. Leslie, W.S.; Hankey, C.R.; McCombie, L.; Lean, M.E. Weight management: A survey of current practice in secondary care NHS settings in 2004. *J. Eval. Clin. Prac.* **2005**, *11*, 462–467.

© 2014 by the authors; licensee MDPI, Basel, Switzerland. This article is an open access article distributed under the terms and conditions of the Creative Commons Attribution license (http://creativecommons.org/licenses/by/3.0/).
